# Supplementary material for: Differential Demographic and Clinical Characteristics between MMR Vaccinated and Unvaccinated Children in South Korea: A Nationwide Study
Source: MDPI journal article supplement (doi:10.3390/vaccines9060653), 2021-06-15
Supplement: s1 [file s1]

**Table S1.** Diagnosis codes for defining comorbidities

| <b>Conditions</b>              | <b>ICD-10 code(s)</b>                                                                                                                                                                                                                                                                                                                                                                        |
|--------------------------------|----------------------------------------------------------------------------------------------------------------------------------------------------------------------------------------------------------------------------------------------------------------------------------------------------------------------------------------------------------------------------------------------|
| Small for gestational age      | P051                                                                                                                                                                                                                                                                                                                                                                                         |
| Low birthweight                | C00-C97, D00-D48                                                                                                                                                                                                                                                                                                                                                                             |
| Birth injury                   | P07 or catastrophic illness domestic code (F002)                                                                                                                                                                                                                                                                                                                                             |
| Infections in perinatal period | P10-P15                                                                                                                                                                                                                                                                                                                                                                                      |
| Congenital anomaly             | P45-P39                                                                                                                                                                                                                                                                                                                                                                                      |
|                                | Q00-Q99 (Q89 excluded) or catastrophic illness domestic codes (V021, V143, V144, V145, V146, V147, V148, V149, V150, V151, V154, V155, V156, V157, V158, V159, V160, V179, V180, V181, V182, V183, V184, V185, V186, V204, V205, V214, V215, V216, V217, V218, V225, V226, V227, V228, V229, V230, V239, V240, V241, V242, V243, V244, V245, V264, V265, V266, V267, V269, V270, V271, V272) |
| Asplenia                       | Q89                                                                                                                                                                                                                                                                                                                                                                                          |
| Anaphylaxis                    | T78.2, T88.6                                                                                                                                                                                                                                                                                                                                                                                 |
| Measles                        | B05                                                                                                                                                                                                                                                                                                                                                                                          |
| Mumps                          | B25                                                                                                                                                                                                                                                                                                                                                                                          |
| Rubella                        | B06                                                                                                                                                                                                                                                                                                                                                                                          |

ICD, International Classification of Disease

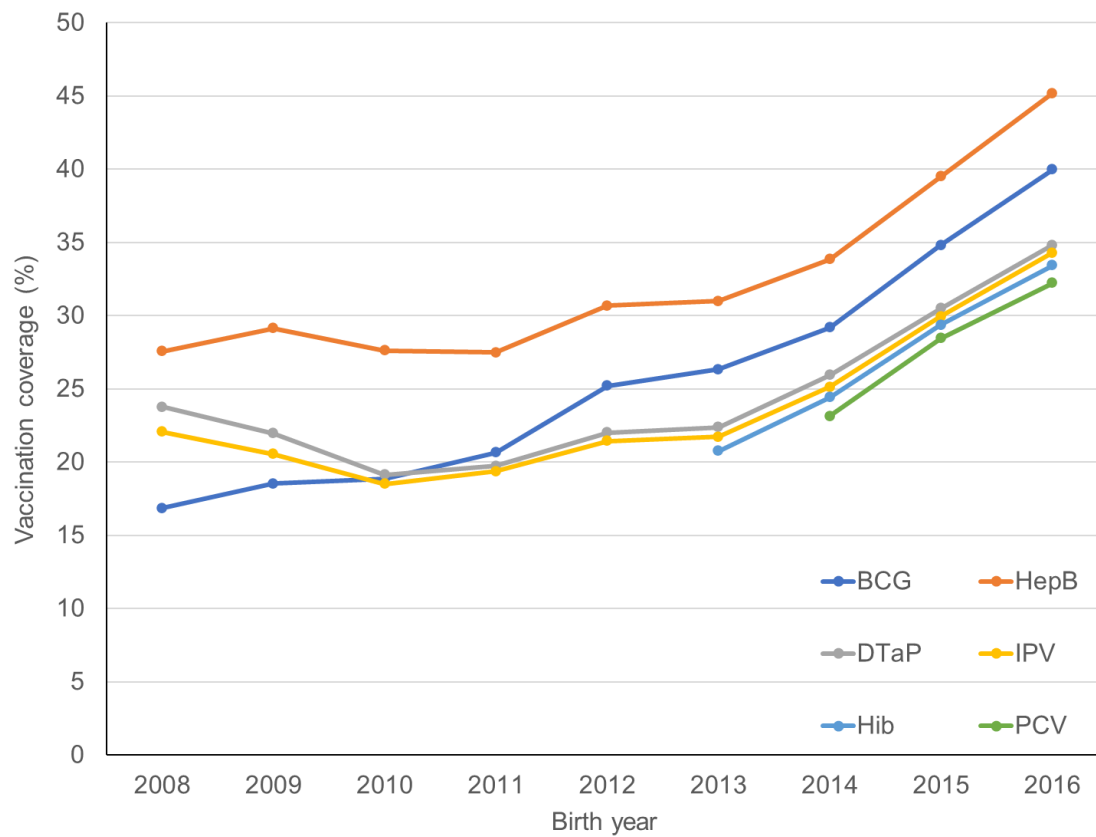

**Figure S1(a).** Coverage of other routinely recommended vaccines by the first year of birth among MMR unvaccinated group born between 2008 and Dec 2016.

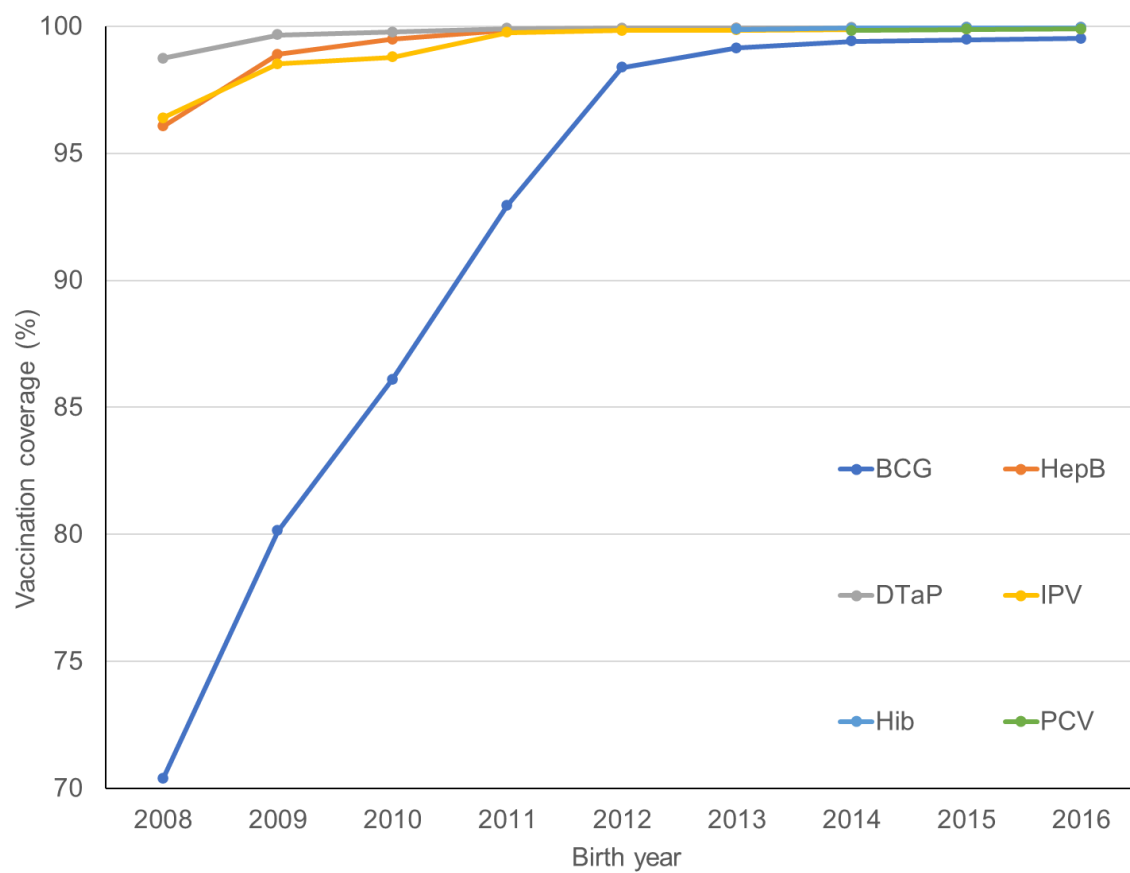

**Figure S1(b).** Coverage of other routinely recommended vaccines by the first year of birth among MMR vaccinated group born between 2008 and Dec 2016.
